# Supplementary material for: Characterizing Soil Moisture Drought Onset and Termination in Europe
Source: Copernicus journal article supplement (doi:10.5194/egusphere-2025-503), 2025-02-25
Supplement: Supplementary file 1 [file egusphere-2025-503-supplement.pdf]

Supplement of  
Characterizing Soil Moisture Drought Onset and Termination in Europe

Woon Mi Kim<sup>1,4</sup> and Santos J. González-Rojí<sup>2,3,5</sup>

<sup>1</sup>Climate and Global Dynamics Laboratory, NSF National Center for Atmospheric Research, Boulder CO, United States

<sup>2</sup>Climate and Environmental Physics, University of Bern, Bern, Switzerland

<sup>3</sup>Oeschger Centre for Climate Change Research, University of Bern, Bern, Switzerland

<sup>4</sup>now at: Institute of Meteorology and Climate Research Troposphere Research (IMKTRO), Karlsruhe Institute of Technology, Eggenstein-Leopoldshafen, Germany

<sup>5</sup>now at: Department of Physics, University of the Basque Country (UPV/EHU), Leioa, Spain

**Correspondence:** Woon Mi Kim (woon.kim@kit.edu)

**Table S1.** Averaged index of each circulation mode as in Table 3, together with the corresponding frequency of occurrence in percentage. Colors indicate the phase state, either positive or negative.

|      |     | WCEU        |             | ECEU        |             | IP          |             | EMED        |             |
|------|-----|-------------|-------------|-------------|-------------|-------------|-------------|-------------|-------------|
|      |     | DO          | DT          | DO          | DT          | DO          | DT          | DO          | DT          |
| SCA  | DJF | 0.14 (50%)  | -0.06 (51%) | 0.10 (51%)  | 0.04 (55%)  |             |             |             |             |
|      | MAM | -0.13 (59%) | -0.09 (53%) |             |             | -0.16 (56%) | 0.04 (52%)  |             |             |
|      | JJA | -0.13 (62%) | 0.15 (50%)  | -0.17 (64%) | 0.21 (52%)  | -0.18 (61%) | 0.24 (53%)  | -0.19 (64%) | 0.27 (56%)  |
|      | SON | 0.11 (57%)  | 0.09 (54%)  | 0.12 (58%)  | 0.10 (50%)  | -0.12 (59%) | 0.24 (61%)  |             |             |
| NAO  | DJF | 0.14 (63%)  | 0.20 (56%)  | 0.17 (64%)  | 0.20 (57%)  | 0.18 (62%)  | -0.07 (53%) | 0.14 (65%)  | -0.08 (56%) |
|      | MAM | 0.14 (58%)  | 0.01 (55%)  | 0.26 (62%)  | 0.04 (57%)  | 0.25 (63%)  | -0.06 (53%) | 0.22 (61%)  | 0.07 (52%)  |
|      | JJA |             |             |             |             | -0.22 (59%) | 0.08 (57%)  | -0.25 (58%) | 0.24 (67%)  |
|      | SON | 0.23 (56%)  | -0.17 (59%) | 0.30 (58%)  | -0.13 (57%) | 0.19 (58%)  | -0.16 (61%) | 0.12 (53%)  | 0.05 (48%)  |
| EA   | DJF |             |             |             |             | -0.09 (59%) | 0.15 (55%)  | 0.01 (50%)  | -0.08 (56%) |
|      | MAM |             |             |             |             | -0.03 (56%) |             |             |             |
|      | JJA | 0.23 (61%)  | 0.21 (59%)  | 0.28 (62%)  | 0.16 (53%)  | 0.32 (62%)  | -0.08 (52%) |             |             |
|      | SON |             |             | 0.27 (63%)  | -0.04 (53%) |             |             | 0.24 (58%)  | -0.19 (59%) |
| EAWR | DJF | 0.12 (57%)  | -0.30 (66%) | 0.03 (53%)  | -0.31 (65%) | 0.19 (56%)  | -0.24 (62%) | 0.27 (63%)  | -0.39 (70%) |
|      | MAM | 0.20 (56%)  | -0.24 (60%) | 0.21 (57%)  | -0.25 (61%) |             |             | 0.03 (53%)  | -0.12 (57%) |
|      | JJA |             |             |             |             | -0.20 (56%) | -0.03 (53%) |             |             |
|      | SON | 0.09 (56%)  | -0.27 (60%) | 0.04 (53%)  | -0.34 (66%) |             |             | 0.13 (56%)  | -0.10 (52%) |

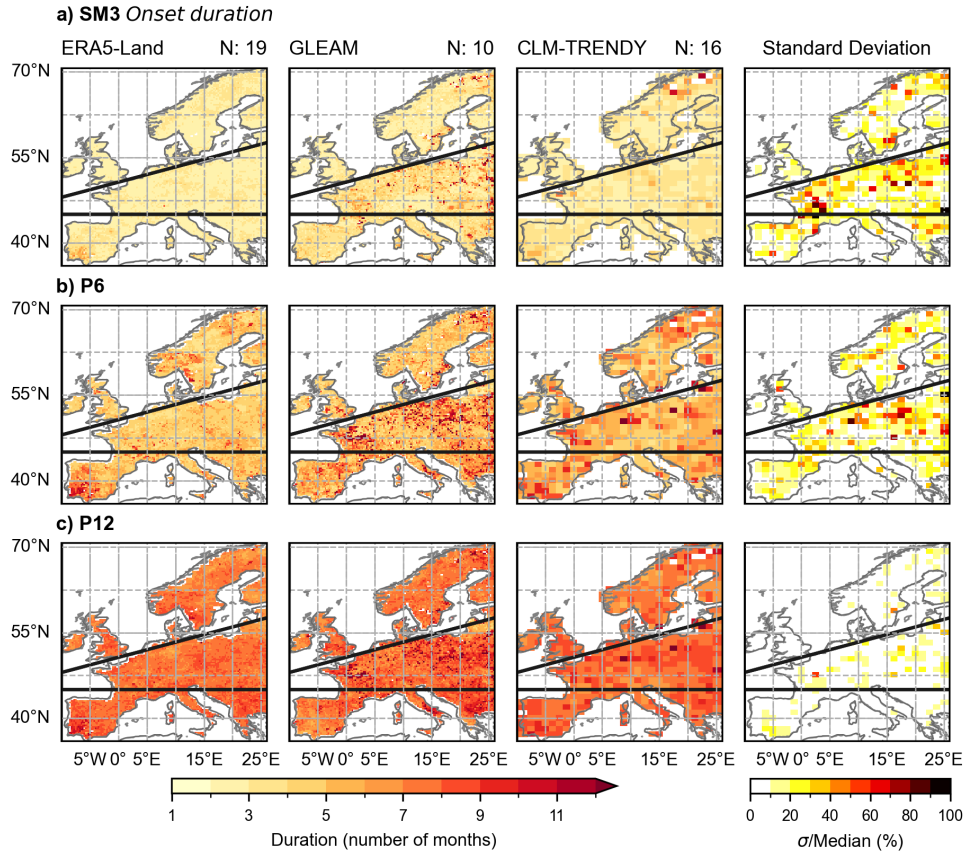

**Figure S1.** The mean duration of DO of droughts over Europe during 1980–2020. N indicates the median of the number of drought events over the study region. The standard deviations of the mean duration across the three soil moisture datasets are shown in the right-most panels.

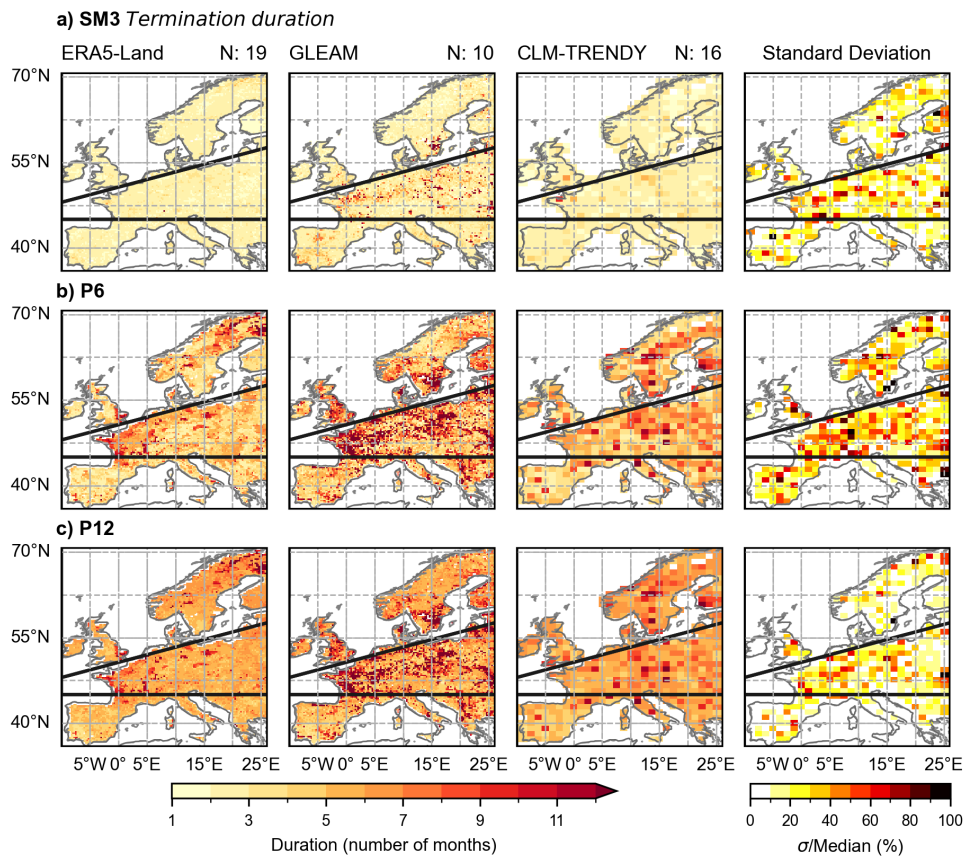

**Figure S2.** Same as Fig. S1 but for DT.

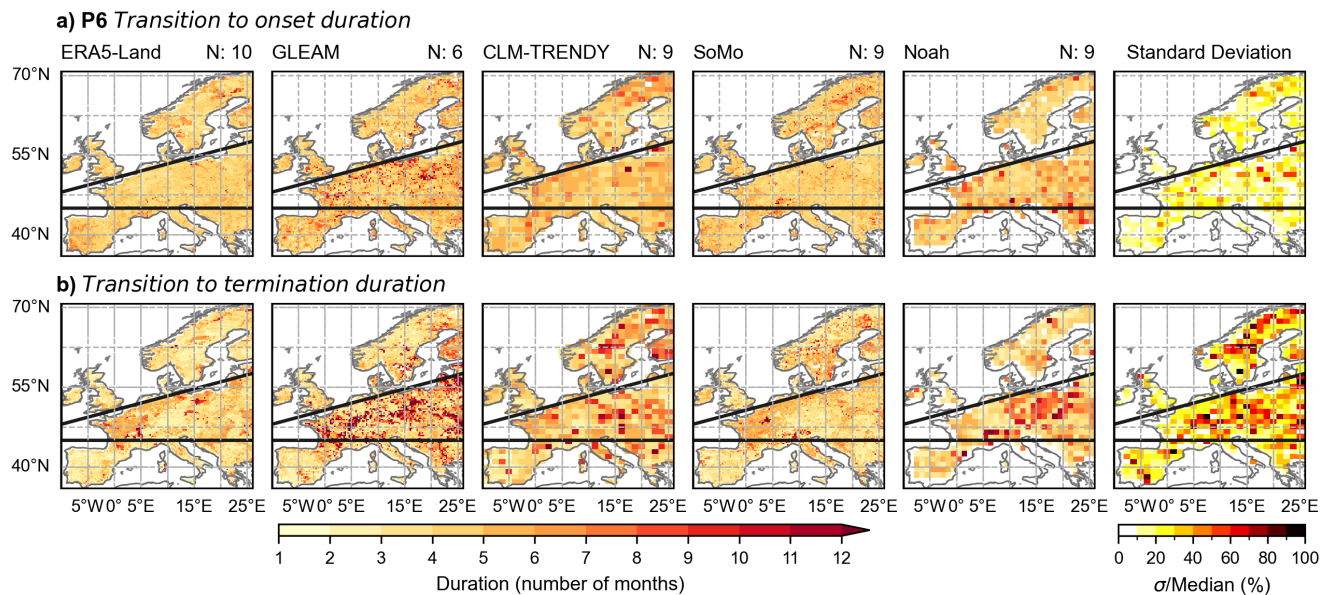

**Figure S3.** Duration of a) DO and b) DT based on P6 during 2000–2020.

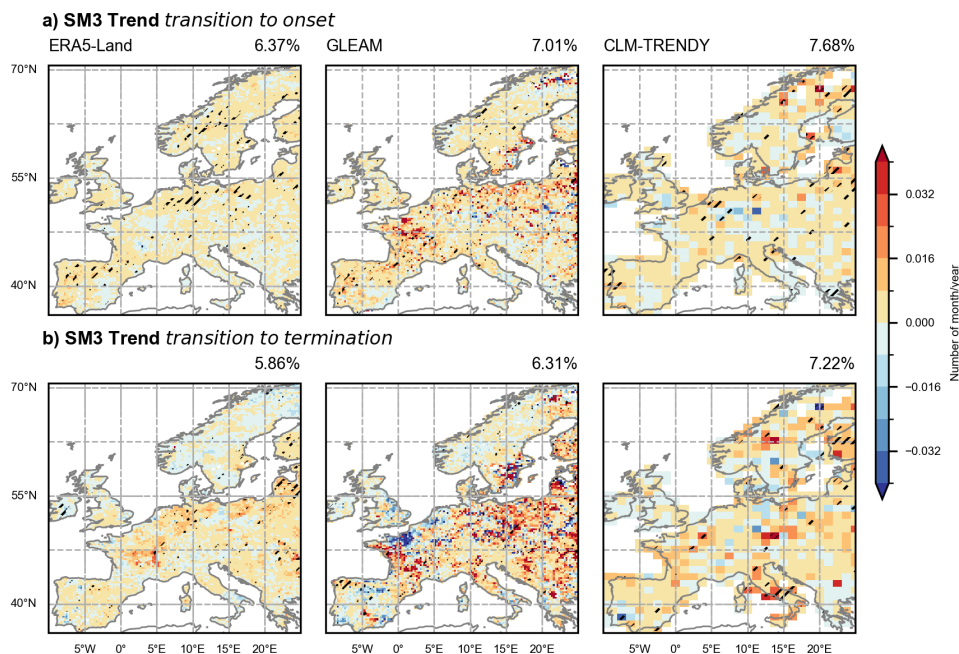

**Figure S4.** Linear trend coefficients for SM3-based transition periods during 1980–2020: a) DO and b) DT. The regions where the trends are statistically significant at a 95% confidence level are dashed.

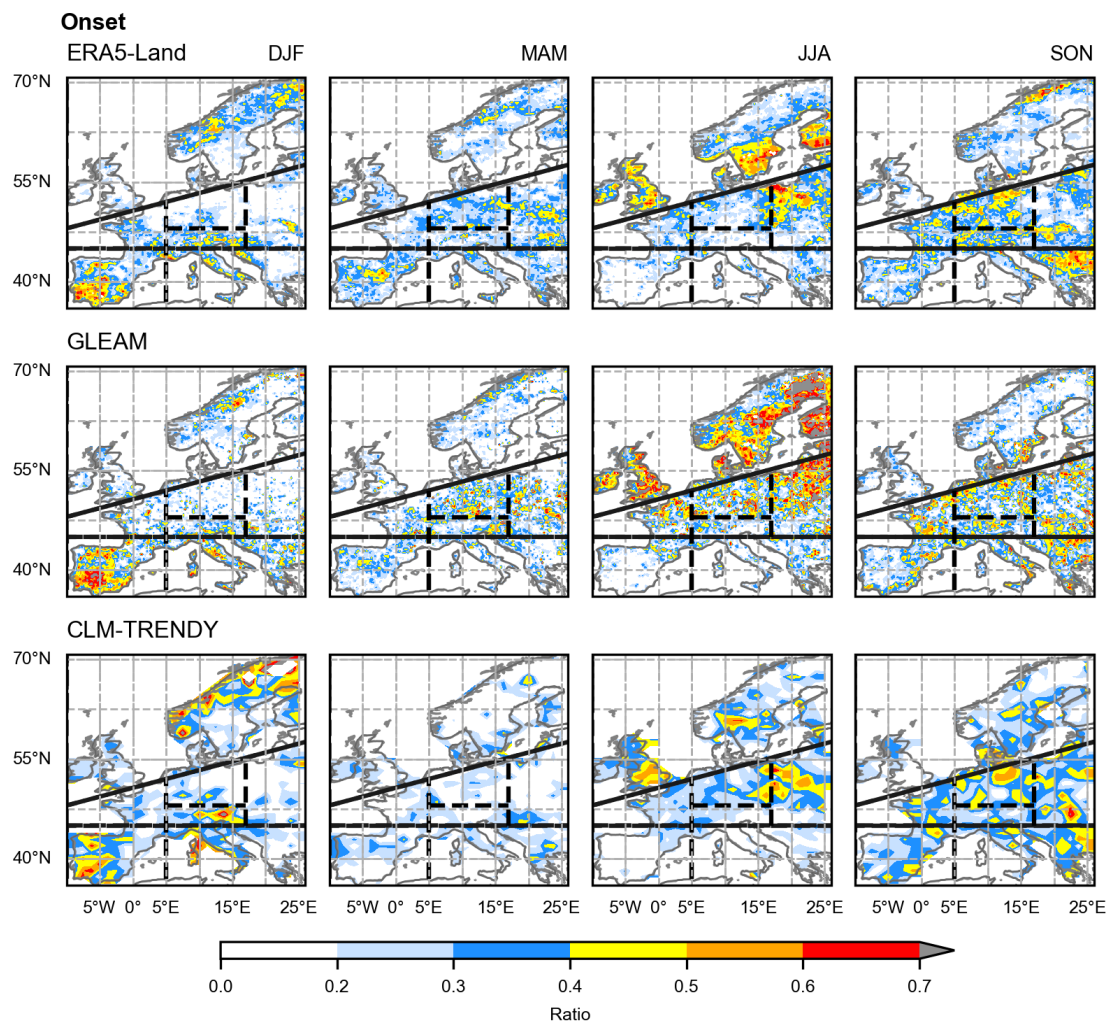

**Figure S5.** Ratio of seasonal occurrence of DO for 1980–2020. Subregions are delimited with black lines.



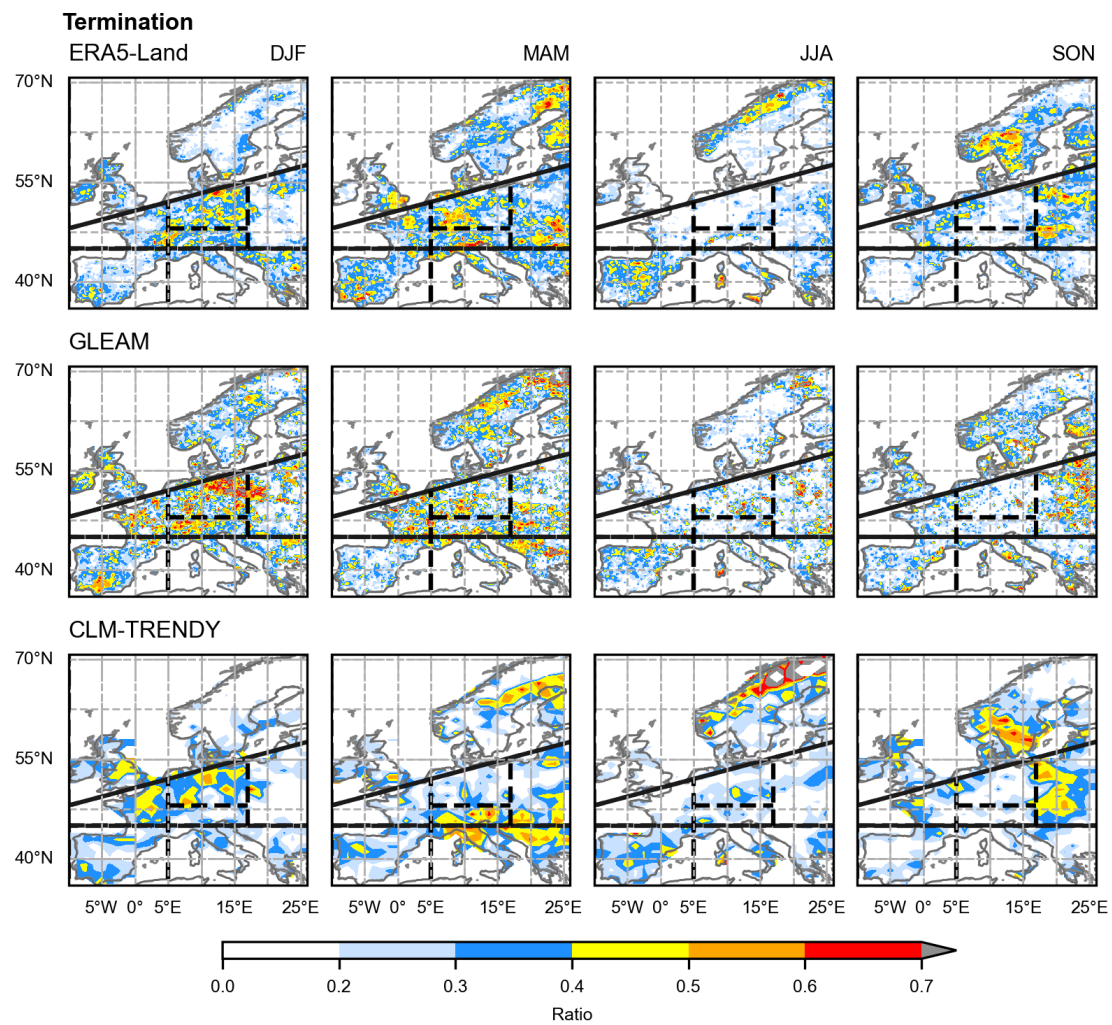

**Figure S6.** Same as Fig. S5 but for DT.

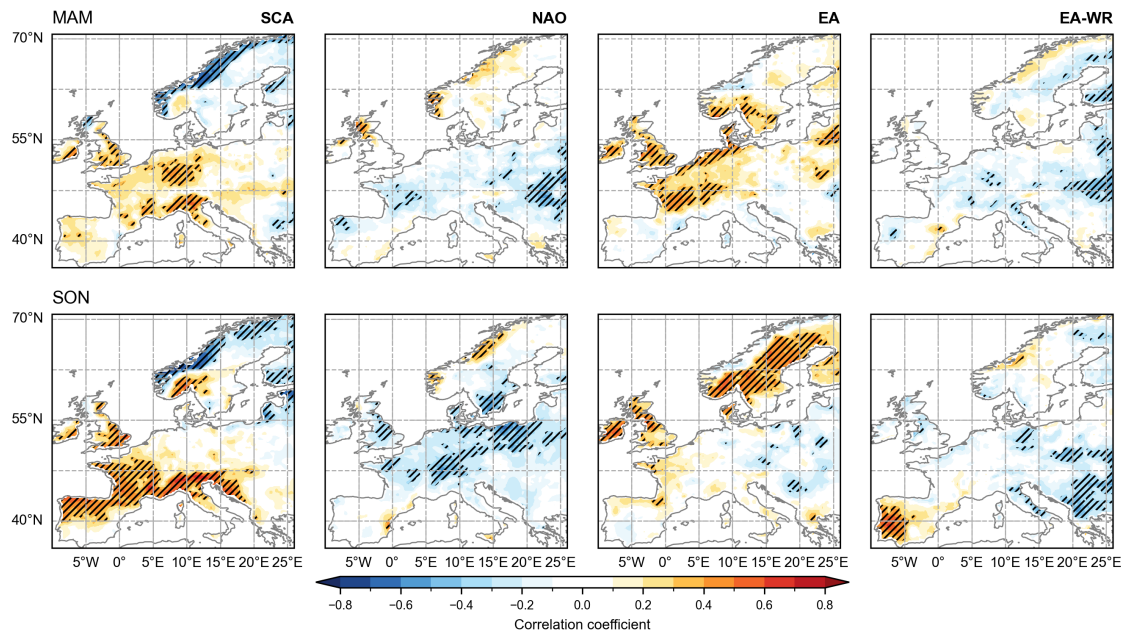

**Figure S7.** Pearson correlation coefficients between seasonal mean indices of circulation modes and seasonal precipitation for MAM (upper panels, and SON (lower panels). The regions where the coefficients are statistically significant at a 95% confidence level are dashed.
